# Supplementary material for: The role of the [CpM(CO)2]− chromophore in the optical properties of the [Cp2ThMCp(CO)2]+ complexes, where M = Fe, Ru and Os. A theoretical view
Source: Royal Society of Chemistry journal article supplement (doi:10.1039/c5dt03121d), 2015-01-01
Supplement: c5dt03121d1.pdf [file c5dt03121d1.pdf]

**The role of the [CpM(CO)<sub>2</sub>]<sup>-</sup> Chromophore in the Optical properties of the  
[Cp<sub>2</sub>ThMCp(CO)<sub>2</sub>]<sup>+</sup> complexes, where M=Fe, Ru and Os.**

**Theoretical View**

Plinio Cantero-López<sup>a</sup>, Laura Le Bras<sup>b</sup>, Dayán Páez-Hernández<sup>a</sup>, Ramiro Arratia-Pérez<sup>a</sup>

<sup>a</sup>Relativistic Molecular Physics (ReMoPh) Group, Ph.D. Program in Molecular Physical Chemistry,  
Universidad Andrés Bello, Av. República 275, Santiago 8370146, Chile.

<sup>b</sup>Institut des Sciences Chimiques de Rennes UMR CNRS 6226, Université de Rennes 1, 35042  
Rennes, France

Núcleo Milenio de Ingeniería Molecular para Catálisis y Biosensores, ICM, Chile.

**Supporting Information**

Optimized geometries for the three complexes [Cp<sub>2</sub>ThMCp(CO)<sub>2</sub>]<sup>+</sup> M= Fe, Ru, Os

-Level of Theory ZORA/BP86/TZ2P

**[Cp<sub>2</sub>ThFeCp(CO)<sub>2</sub>]<sup>+</sup>**

|    |              |              |              |
|----|--------------|--------------|--------------|
| Fe | -2.022305000 | 0.239785000  | 0.000000000  |
| C  | -3.131484000 | -1.146368000 | -1.149379000 |
| C  | -3.900901000 | -0.808389000 | 0.000000000  |
| C  | -3.131484000 | -1.146368000 | 1.149379000  |
| C  | -1.902051000 | -1.763073000 | 0.714404000  |
| C  | -1.902051000 | -1.763073000 | -0.714404000 |
| H  | -3.423626000 | -0.996205000 | -2.182284000 |
| H  | -4.875976000 | -0.336523000 | 0.000000000  |
| H  | -3.423626000 | -0.996205000 | 2.182284000  |

|    |              |              |              |
|----|--------------|--------------|--------------|
| H  | -1.175034000 | -2.234158000 | 1.373938000  |
| H  | -1.175034000 | -2.234158000 | -1.373938000 |
| Th | 0.684657000  | -0.173675000 | 0.000000000  |
| C  | 2.641661000  | 0.818242000  | -1.719762000 |
| C  | 2.788076000  | -0.591890000 | -1.793947000 |
| C  | 1.641793000  | -1.117917000 | -2.451334000 |
| C  | 0.789554000  | -0.032825000 | -2.791195000 |
| C  | 1.402508000  | 1.163447000  | -2.329093000 |
| H  | 3.357555000  | 1.514357000  | -1.295129000 |
| H  | 3.630966000  | -1.168016000 | -1.424985000 |
| H  | 1.460786000  | -2.166375000 | -2.670254000 |
| H  | -0.156109000 | -0.102806000 | -3.318720000 |
| H  | 1.007777000  | 2.168273000  | -2.445268000 |
| C  | 2.641661000  | 0.818242000  | 1.719762000  |
| C  | 2.788076000  | -0.591890000 | 1.793947000  |
| C  | 1.641793000  | -1.117917000 | 2.451334000  |
| C  | 0.789554000  | -0.032825000 | 2.791195000  |
| C  | 1.402508000  | 1.163447000  | 2.329093000  |
| H  | 3.357555000  | 1.514357000  | 1.295129000  |
| H  | 3.630966000  | -1.168016000 | 1.424985000  |
| H  | 1.460786000  | -2.166375000 | 2.670254000  |
| H  | -0.156109000 | -0.102806000 | 3.318720000  |
| H  | 1.007777000  | 2.168273000  | 2.445268000  |
| C  | -1.884209000 | 1.442400000  | 1.252507000  |
| O  | -1.869426000 | 2.263681000  | 2.084483000  |
| C  | -1.884209000 | 1.442400000  | -1.252507000 |
| O  | -1.869426000 | 2.263681000  | -2.084483000 |

**[Cp<sub>2</sub>ThRuCp(CO)<sub>2</sub>]<sup>+</sup>**

|    |              |              |              |
|----|--------------|--------------|--------------|
| Os | -2.095727000 | 0.262556000  | 0.000000000  |
| C  | -3.257388000 | -1.373020000 | -1.153620000 |
| C  | -4.038315000 | -1.054365000 | 0.000000000  |
| C  | -3.257388000 | -1.373020000 | 1.153620000  |
| C  | -2.016894000 | -1.956737000 | 0.717427000  |
| C  | -2.016894000 | -1.956737000 | -0.717427000 |
| H  | -3.564195000 | -1.248258000 | -2.185418000 |
| H  | -5.034939000 | -0.628611000 | 0.000000000  |
| H  | -3.564195000 | -1.248258000 | 2.185418000  |
| H  | -1.276617000 | -2.411582000 | 1.370151000  |
| H  | -1.276617000 | -2.411582000 | -1.370151000 |
| Th | 0.759516000  | -0.202687000 | 0.000000000  |
| C  | 2.689380000  | 0.828422000  | -1.723286000 |
| C  | 2.831328000  | -0.578843000 | -1.840759000 |
| C  | 1.672476000  | -1.083465000 | -2.493154000 |
| C  | 0.817052000  | 0.012028000  | -2.786681000 |
| C  | 1.439262000  | 1.193389000  | -2.299527000 |
| H  | 3.414943000  | 1.510984000  | -1.293452000 |
| H  | 3.677792000  | -1.167573000 | -1.500091000 |
| H  | 1.483473000  | -2.125298000 | -2.736325000 |
| H  | -0.139146000 | -0.042056000 | -3.296574000 |
| H  | 1.044323000  | 2.201663000  | -2.379219000 |
| C  | 2.689380000  | 0.828422000  | 1.723286000  |
| C  | 2.831328000  | -0.578843000 | 1.840759000  |

|   |              |              |              |
|---|--------------|--------------|--------------|
| C | 1.672476000  | -1.083465000 | 2.493154000  |
| C | 0.817052000  | 0.012028000  | 2.786681000  |
| C | 1.439262000  | 1.193389000  | 2.299527000  |
| H | 3.414943000  | 1.510984000  | 1.293452000  |
| H | 3.677792000  | -1.167573000 | 1.500091000  |
| H | 1.483473000  | -2.125298000 | 2.736325000  |
| H | -0.139146000 | -0.042056000 | 3.296574000  |
| H | 1.044323000  | 2.201663000  | 2.379219000  |
| C | -1.910128000 | 1.584389000  | 1.316013000  |
| O | -1.848929000 | 2.400843000  | 2.152952000  |
| C | -1.910128000 | 1.584389000  | -1.316013000 |
| O | -1.848929000 | 2.400843000  | -2.152952000 |

**[Cp<sub>2</sub>ThOsCp(CO)<sub>2</sub>]<sup>+</sup>**

|    |              |              |              |
|----|--------------|--------------|--------------|
| Ru | -2.079698000 | 0.274993000  | 0.000000000  |
| C  | -3.214293000 | -1.376665000 | -1.149857000 |
| C  | -4.001729000 | -1.080310000 | 0.000000000  |
| C  | -3.214293000 | -1.376665000 | 1.149857000  |
| C  | -1.967954000 | -1.953032000 | 0.713366000  |
| C  | -1.967954000 | -1.953032000 | -0.713366000 |
| H  | -3.522651000 | -1.259833000 | -2.183074000 |
| H  | -5.005226000 | -0.668865000 | 0.000000000  |
| H  | -3.522651000 | -1.259833000 | 2.183074000  |
| H  | -1.230871000 | -2.413423000 | 1.367511000  |
| H  | -1.230871000 | -2.413423000 | -1.367511000 |
| Th | 0.719228000  | -0.187552000 | 0.000000000  |

|   |              |              |              |
|---|--------------|--------------|--------------|
| C | 2.702708000  | 0.781136000  | -1.706141000 |
| C | 2.781429000  | -0.629893000 | -1.834265000 |
| C | 1.605125000  | -1.076220000 | -2.498777000 |
| C | 0.801657000  | 0.058870000  | -2.786809000 |
| C | 1.473578000  | 1.206936000  | -2.284540000 |
| H | 3.456050000  | 1.426664000  | -1.267275000 |
| H | 3.598864000  | -1.258634000 | -1.494502000 |
| H | 1.371583000  | -2.105797000 | -2.754371000 |
| H | -0.151650000 | 0.052171000  | -3.304610000 |
| H | 1.126764000  | 2.233365000  | -2.357918000 |
| C | 2.702708000  | 0.781136000  | 1.706141000  |
| C | 2.781429000  | -0.629893000 | 1.834265000  |
| C | 1.605125000  | -1.076220000 | 2.498777000  |
| C | 0.801657000  | 0.058870000  | 2.786809000  |
| C | 1.473578000  | 1.206936000  | 2.284540000  |
| H | 3.456050000  | 1.426664000  | 1.267275000  |
| H | 3.598864000  | -1.258634000 | 1.494502000  |
| H | 1.371583000  | -2.105797000 | 2.754371000  |
| H | -0.151650000 | 0.052171000  | 3.304610000  |
| H | 1.126764000  | 2.233365000  | 2.357918000  |
| C | -1.896044000 | 1.606526000  | 1.306787000  |
| O | -1.846675000 | 2.445733000  | 2.116608000  |
| C | -1.896044000 | 1.606526000  | -1.306787000 |
| O | -1.846675000 | 2.445733000  | -2.116608000 |
